# Supplementary material for: Characterization and Optimization of the Seeding Process of Adipose Stem Cells on the Polycaprolactone Scaffolds
Source: PubMed Central journal article supplement (PMC6402208; doi:10.1155/2019/1201927), 2019-02-20
Supplement: 1201927.f1.pdf [file 1201927.f1.pdf]

1 **SUPPLEMENTARY MATERIALS (Manuscript No 1201927).**

2  
3 MTS standard curve.

4 Effect of cell number on absorbance at 490 nm. Various numbers of ASCs were  
5 cultured in a final volume of 200 µl/well by incubating at 37°C. MTS reagent was added  
6 and absorbance at 490nm was recorded using spectrophotometer (Multiscan Go,  
7 ThermoScientific, Vantaa, Finland) plate reader. Each point represents a mean of 3  
8 replicates. Assay was performed according to the kit protocol.

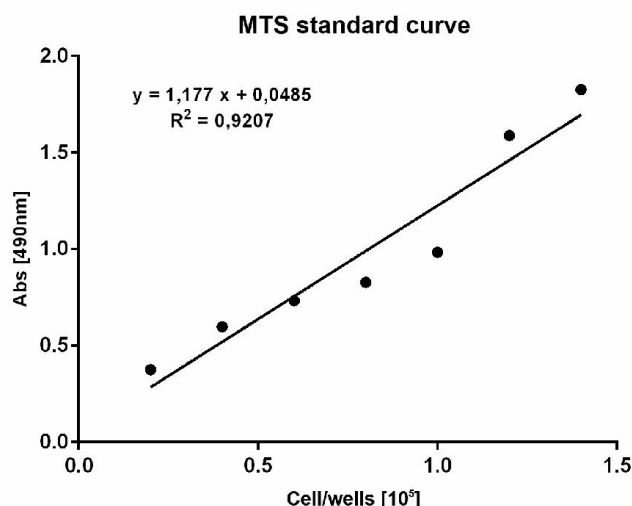

9  
10  
11 TABLE 1: Characterization of donors and number of SVF (n=17).

| Donor (female) | Age [years] | Volume of lipoaspirate [ml] | Viability of SVF [%] | Total cell number (SVF) [x10 <sup>6</sup> ] |
|----------------|-------------|-----------------------------|----------------------|---------------------------------------------|
| 1              | 40          | 200                         | 84                   | 83.6                                        |
| 2              | 52          | 184                         | 90                   | 35.8                                        |
| 3              | 59          | 180                         | 92                   | 103.0                                       |
| 4              | 43          | 200                         | 80                   | 97.0                                        |
| 5              | 46          | 160                         | 92                   | 101.0                                       |
| 6              | 47          | 160                         | 98                   | 53.0                                        |
| 7              | 52          | 180                         | 91                   | 152.0                                       |
| 8              | 51          | 180                         | 85                   | 55.80                                       |
| 9              | 41          | 180                         | 92                   | 30.0                                        |
| 10             | 43          | 110                         | 80                   | 30.40                                       |
| 11             | 47          | 105                         | 80                   | 66.0                                        |
| 12             | 55          | 120                         | 77                   | 27.0                                        |
| 13             | 41          | 200                         | 80                   | 35.0                                        |
| 14             | 56          | 210                         | 80                   | 36.0                                        |
| 15             | 50          | 90                          | 88                   | 28.0                                        |
| 16             | 55          | 160                         | 88                   | 66.0                                        |
| 17             | 57          | 160                         | 88                   | 20.0                                        |

12  
13  
14  
15

16 TABLE 2: Growth kinetics of human ASCs. Summary table of average number of  
 17 human ASCs. M  $\pm$  SD. (n=3).

| Passage | Average number of cells [10 <sup>6</sup> ]. M $\pm$ SD | Passage | Average number of cells [10 <sup>6</sup> ]. M $\pm$ SD |
|---------|--------------------------------------------------------|---------|--------------------------------------------------------|
| 0       | 0.53 $\pm$ 0.152                                       | 12      | 1.01 $\pm$ 0.175                                       |
| 1       | 0.97 $\pm$ 0.075                                       | 13      | 1.01 $\pm$ 0.125                                       |
| 2       | 1.53 $\pm$ 0.212                                       | 14      | 0.62 $\pm$ 0.037                                       |
| 3       | 2.53 $\pm$ 0.351                                       | 15      | 1.50 $\pm$ 0.173                                       |
| 4       | 1.83 $\pm$ 0.321                                       | 16      | 1.46 $\pm$ 0.152                                       |
| 5       | 3.09 $\pm$ 0.062                                       | 17      | 0.68 $\pm$ 0.076                                       |
| 6       | 1.31 $\pm$ 0.331                                       | 18      | 0.80 $\pm$ 0.173                                       |
| 7       | 0.99 $\pm$ 0.228                                       | 19      | 0.41 $\pm$ 0.036                                       |
| 8       | 0.82 $\pm$ 0.175                                       | 20      | 0.28 $\pm$ 0.026                                       |
| 9       | 1.21 $\pm$ 0.314                                       | 21      | 0.26 $\pm$ 0.028                                       |
| 10      | 1.31 $\pm$ 0.220                                       | 22      | 0.13 $\pm$ 0.026                                       |
| 11      | 1.63 $\pm$ 0.413                                       | 23      | 0.12 $\pm$ 0.037                                       |

18  
 19 TABLE 3: Seeding efficiency of human ASCs within PCL and PCL+5%TCP scaffolds.  
 20 Summary table of absorbance values measured by the MTS test for seeding hASC into  
 21 PCL and PCL+5%TCP. M  $\pm$  SD, (n=3). hASC- human adipose stem cells, PCL-  
 22 polycaprolactone, PCL+5% TCP polycaprolactone covered 5% tricalcium phosphate.

|            |             | hASC PCL    |             |             |             | hASC PCL +5% TCP |             |             |             |
|------------|-------------|-------------|-------------|-------------|-------------|------------------|-------------|-------------|-------------|
|            |             | 1           | 3           | 7           | 21          | 1                | 3           | 7           | 21          |
| 50 $\mu$ l | Time [day]  |             |             |             |             |                  |             |             |             |
|            | Abs [490nm] | 0.57        | 0.65        | 0.61        | 0.71        | 0.46             | 0.56        | 0.60        | 0.65        |
|            |             | 0.58        | 0.75        | 0.63        | 0.64        | 0.48             | 0.59        | 0.36        | 0.44        |
|            |             | 0.59        | 0.76        | 0.68        | 0.69        | 0.38             | 0.46        | 0.53        | 0.67        |
|            | M           | <b>0.58</b> | <b>0.72</b> | <b>0.64</b> | <b>0.68</b> | <b>0.44</b>      | <b>0.53</b> | <b>0.49</b> | <b>0.58</b> |
| SD         | <b>0.05</b> | <b>0.04</b> | <b>0.12</b> | <b>0.12</b> | <b>0.05</b> | <b>0.06</b>      | <b>0.12</b> | <b>0.12</b> |             |
|            |             | 1           | 3           | 7           | 21          | 1                | 3           | 7           | 21          |
| 35 $\mu$ l | Time [day]  |             |             |             |             |                  |             |             |             |
|            | Abs [490nm] | 0.47        | 0.80        | 0.83        | 0.97        | 0.82             | 0.84        | 0.92        | 1.25        |
|            |             | 0.48        | 0.65        | 0.75        | 0.87        | 0.61             | 0.89        | 0.89        | 1.22        |
|            |             | 0.37        | 0.77        | 0.89        | 0.78        | 0.60             | 0.83        | 0.79        | 1.00        |
|            | M           | <b>0.44</b> | <b>0.74</b> | <b>0.82</b> | <b>0.87</b> | <b>0.67</b>      | <b>0.85</b> | <b>0.87</b> | <b>1.15</b> |
| SD         | <b>0.06</b> | <b>0.08</b> | <b>0.06</b> | <b>0.09</b> | <b>0.12</b> | <b>0.03</b>      | <b>0.06</b> | <b>0.13</b> |             |

23  
 24 TABLE 4: Summary table of absorbance values measured by the MTS test for seeding  
 25 human ASC into PCL and PCL+5%TCP. M  $\pm$  SD, (n=6).

| Seeding methods | the basic static cell seeding into PCL [Abs=490nm] |        | the basic static cell seeding into PCL+5%TCP [Abs=490nm] |       | the saturation of cell suspension with incubation into PCL [Abs=490nm] |       | the saturation of cell suspension with incubation into PCL+5%TCP [Abs=490nm] |       |
|-----------------|----------------------------------------------------|--------|----------------------------------------------------------|-------|------------------------------------------------------------------------|-------|------------------------------------------------------------------------------|-------|
|                 | 1                                                  | 7      | 1                                                        | 7     | 1                                                                      | 7     | 1                                                                            | 7     |
| Time [day]      |                                                    |        |                                                          |       |                                                                        |       |                                                                              |       |
|                 | 0.565                                              | 0.797  | 0.259                                                    | 0.631 | 0.210                                                                  | 1.254 | 0.818                                                                        | 1.431 |
|                 | 0.623                                              | 0.793  | 0.384                                                    | 0.641 | 0.198                                                                  | 1.428 | 1.048                                                                        | 1.774 |
|                 | 0.544                                              | 0.7320 | 0.352                                                    | 0.594 | 0.287                                                                  | 1.012 | 0.954                                                                        | 1.333 |
|                 | 0.495                                              | 0.759  | 0.298                                                    | 0.614 | 0.394                                                                  | 1.125 | 1.067                                                                        | 1.568 |
|                 | 0.619                                              | 0.759  | 0.391                                                    | 0.659 | 0.378                                                                  | 0.987 | 0.924                                                                        | 2.116 |

|           |              |              |              |              |              |              |              |              |
|-----------|--------------|--------------|--------------|--------------|--------------|--------------|--------------|--------------|
|           | 0.583        | 0.721        | 0.341        | 0.710        | 0.417        | 1.102        | 1.323        | 1.581        |
| <b>M</b>  | <b>0.571</b> | <b>0.760</b> | <b>0.337</b> | <b>0.641</b> | <b>0.314</b> | <b>1.151</b> | <b>1.023</b> | <b>1.633</b> |
| <b>SD</b> | <b>0.048</b> | <b>0.031</b> | <b>0.050</b> | <b>0.040</b> | <b>0.096</b> | <b>0.165</b> | <b>0.172</b> | <b>0.279</b> |

26

27 TABLE 5: Summary table of absorbance values measured by the MTS test for seeding  
 28 human ASC into PCL. and average number of cells. measured by the standard curve of  
 29 MTS. M  $\pm$  SD, (n=3).

| <b>Time [day]</b>      | <b>3</b>                                                                                                     | <b>7</b>          | <b>21</b>         |
|------------------------|--------------------------------------------------------------------------------------------------------------|-------------------|-------------------|
| <b>Initial density</b> | <b>Abs MTS [490nm]</b>                                                                                       |                   |                   |
| 0.5 x10 <sup>6</sup>   | 0.926 $\pm$ 0.108                                                                                            | 0.861 $\pm$ 0.139 | 1.586 $\pm$ 0.081 |
| 0.9 x10 <sup>6</sup>   | 1.135 $\pm$ 0.084                                                                                            | 1.462 $\pm$ 0.095 | 1.060 $\pm$ 0.168 |
| 1.5 x10 <sup>6</sup>   | 1.159 $\pm$ 0.104                                                                                            | 1.06 $\pm$ 0.109  | 1.792 $\pm$ 0.173 |
| <b>Initial density</b> | <b>Average number of cells [x10<sup>5</sup>] after calculate of the standard curve MTS [x10<sup>5</sup>]</b> |                   |                   |
| 0.5 x10 <sup>6</sup>   | 0.746 $\pm$ 0.04                                                                                             | 0.860 $\pm$ 0.077 | 1.580 $\pm$ 0.028 |
| 0.9 x10 <sup>6</sup>   | 0.923 $\pm$ 0.030                                                                                            | 1.731 $\pm$ 0.040 | 1.991 $\pm$ 0.101 |
| 1.5 x10 <sup>6</sup>   | 1.159 $\pm$ 0.047                                                                                            | 1.061 $\pm$ 0.051 | 1.187 $\pm$ 0.105 |

30

31 TABLE 6: Summary table of absorbance values measured by the MTS test for seeding  
 32 human ASC into PCL+5% TCP . and average number of cells. measured by the  
 33 standard curve of MTS (M  $\pm$  SD. (n=3).

| <b>Time [day]</b>      | <b>3</b>                                                                                                     | <b>7</b>          | <b>21</b>         |
|------------------------|--------------------------------------------------------------------------------------------------------------|-------------------|-------------------|
| <b>Initial density</b> | <b>Abs MTS [490nm]</b>                                                                                       |                   |                   |
| 0.5 x10 <sup>6</sup>   | 0.965 $\pm$ 0.061                                                                                            | 0.751 $\pm$ 0.113 | 1.715 $\pm$ 0.060 |
| 0.9 x10 <sup>6</sup>   | 1.155 $\pm$ 0.093                                                                                            | 2.067 $\pm$ 0.229 | 2.381 $\pm$ 0.060 |
| 1.5 x10 <sup>6</sup>   | 1.567 $\pm$ 0.100                                                                                            | 1.426 $\pm$ 0.120 | 1.906 $\pm$ 0.328 |
| <b>Initial denisty</b> | <b>Average number of cells [x10<sup>5</sup>] after calculate of the standard curve MTS [x10<sup>5</sup>]</b> |                   |                   |
| 0.5 x10 <sup>6</sup>   | 0.779 $\pm$ 0.011                                                                                            | 0.597 $\pm$ 0.055 | 1.480 $\pm$ 0.223 |
| 0.9 x10 <sup>6</sup>   | 0.941 $\pm$ 0.038                                                                                            | 1.715 $\pm$ 0.153 | 2.049 $\pm$ 0.109 |
| 1.5 x10 <sup>6</sup>   | 1.291 $\pm$ 0.044                                                                                            | 1.171 $\pm$ 0.061 | 1.579 $\pm$ 0.238 |

34

35 TABLE 7: Summary table of absorbance values measured by the ALP test for seeding  
 36 human ASC into PCL+5% TCP. (M  $\pm$  SD. (n=5).

| <b>Type of scaffold</b> | <b>PCL</b>  | <b>PCL control</b> | <b>PCL</b>  | <b>PCL control</b> | <b>PCL+5%TCP</b> | <b>PCL+5%TCP control</b> | <b>PCL+5%TCP</b> | <b>PCL+5%TCP control</b> |
|-------------------------|-------------|--------------------|-------------|--------------------|------------------|--------------------------|------------------|--------------------------|
| <b>Time [day]</b>       | <b>7</b>    |                    | <b>14</b>   |                    | <b>7</b>         |                          | <b>14</b>        |                          |
|                         | 1.30        | 1.20               | 1.40        | 1.23               | 1.35             | 1.23                     | 1.87             | 1.53                     |
|                         | 1.45        | 1.22               | 1.38        | 1.10               | 1.34             | 1.32                     | 1.90             | 1.43                     |
|                         | 1.35        | 1.42               | 1.47        | 1.13               | 1.40             | 1.30                     | 1.97             | 1.40                     |
|                         | 1.11        | 1.2                | 1.40        | 1.0                | 1.30             | 1.20                     | 1.95             | 1.38                     |
|                         | 1.30        | 1.2                | 1.41        | 1.0                | 1.16             | 1.21                     | 1.93             | 1.43                     |
| <b>M</b>                | <b>1.30</b> | <b>1.22</b>        | <b>1.41</b> | <b>1.1</b>         | <b>1.31</b>      | <b>1.25</b>              | <b>1.92</b>      | <b>1.43</b>              |
| <b>SD</b>               | <b>0.12</b> | <b>0.11</b>        | <b>0.03</b> | <b>0.1</b>         | <b>0.09</b>      | <b>0.05</b>              | <b>0.08</b>      | <b>0.06</b>              |

37
